# Supplementary material for: Hypoxia Decreases Diagnostic Biomarkers for Aspergillosis In Vitro
Source: MDPI journal article supplement (doi:10.3390/jof5030061), 2019-07-11
Supplement: s1 [file s1]

# Supplementary Materials:

## Hypoxia Decreases Diagnostic Biomarkers for Aspergillosis In Vitro

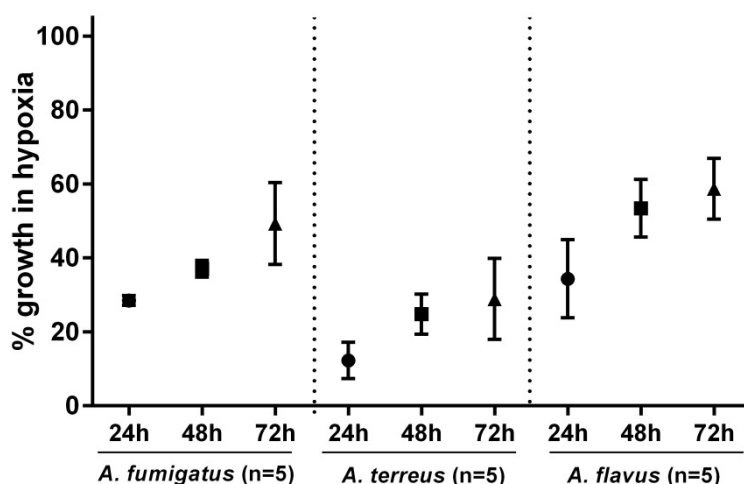

**Figure S1.** Hypoxia led to reduced biomass of *Aspergillus* species. Strains were grown in liquid RPMI<sub>1640</sub> containing 2% glucose at 37 °C under normal oxygen and hypoxic growth conditions for 24 h, 48 h and 72 h. Fungal growth (%) represents percentage of biomass from hypoxic cultures normalized to normoxic growth. For calculations average biomass of all five tested strains was used.

**Table S1.** Release of diagnostic biomarkers during in vitro growth of different *Aspergillus* spp. in RPMI<sub>1640</sub> medium under normal and hypoxic growth conditions. Amount of GM and BDG release was normalized to biomass (dry weight). Multiple t- test (graph pad prism software) was used for statistical analysis of biomarker release in normoxic conditions versus hypoxic conditions, p- values  $\geq 0.05$  were considered statistically different.

| species                   | time (h) | $\mu\text{g GM/mg dry weight}$ |      |         |       |          | $\mu\text{g BDG/mg dry weight}$ |      |         |      |          |
|---------------------------|----------|--------------------------------|------|---------|-------|----------|---------------------------------|------|---------|------|----------|
|                           |          | normoxia                       |      | hypoxia |       | p- value | normoxia                        |      | hypoxia |      | p- value |
|                           |          | mean                           | SD   | mean    | SD    |          |                                 | mean | SD      | mean |          |
| <i>A. fumigatus</i> (n=5) | 24h      | 3.27                           | 0.14 | 11.51   | 2.96  | 0.001    | 0.09                            | 0.07 | 0.27    | 0.16 | 0.04     |
|                           | 48h      | 7.58                           | 3.60 | 11.36   | 3.86  | 0.08     | 0.14                            | 0.05 | 0.16    | 0.06 | 0.53     |
|                           | 72h      | 12.10                          | 3.04 | 10.15   | 2.50  | 0.29     | 0.11                            | 0.03 | 0.14    | 0.07 | 0.44     |
| <i>A. terreus</i> (n=5)   | 24h      | 8.96                           | 1.87 | 26.89   | 10.22 | 0.05     | 0.16                            | 0.03 | 0.76    | 0.52 | 0.05     |
|                           | 48h      | 21.40                          | 4.14 | 15.94   | 4.67  | 0.47     | 0.23                            | 0.13 | 0.24    | 0.08 | 0.52     |
|                           | 72h      | 18.11                          | 2.16 | 21.74   | 5.77  | 0.23     | 0.19                            | 0.09 | 0.19    | 0.07 | 0.99     |
| <i>A. flavus</i> (n=5)    | 24h      | 11.41                          | 0.84 | 20.55   | 6.01  | 0.16     | 0.08                            | 0.02 | 0.30    | 0.12 | 0.13     |
|                           | 48h      | 8.56                           | 2.78 | 7.57    | 0.98  | 0.59     | 0.10                            | 0.07 | 0.23    | 0.06 | 0.23     |
|                           | 72h      | 14.40                          | 3.12 | 9.93    | 0.31  | 0.18     | 0.14                            | 0.06 | 0.15    | 0.07 | 0.76     |

GM; galactomannan; BDG;  $\beta$ -(1,3)-glucan; SD; standard derivation.
